# Supplementary material for: Cosavirus, Salivirus and Bufavirus in Diarrheal Tunisian Infants
Source: PubMed Central journal article supplement (PMC5025138; doi:10.1371/journal.pone.0162255), 2016-09-15
Supplement: pone.0162255.s002.pdf [file pone.0162255.s002.pdf]

**S1 Table. Oligonucleotides used for detection and genotyping of classic enteric viruses in this study**

| <b>Virus</b>  | <b>Method</b>               | <b>Primer/probe</b>                                          | <b>Nucleotide Sequence</b>              | <b>Kit</b>                                                    | <b>Reference</b>                              |
|---------------|-----------------------------|--------------------------------------------------------------|-----------------------------------------|---------------------------------------------------------------|-----------------------------------------------|
| Norovirus GI  | RT-qPCR<br>(screening)      | JJV1NF                                                       | CCA TGT TCC GTT GGA TGC                 | TaqMan <sup>®</sup> fast Virus 1-Step<br>(Applied Biosystems) | Lyman <i>et al</i> , 2009 [17]                |
|               |                             | JJV1R                                                        | TCC TTA GAC GCC ATC ATC AT              |                                                               |                                               |
|               |                             | RING-1b *                                                    | AGA TCG CGG TCT CCT GTC CA              |                                                               |                                               |
|               | RT-PCR<br>(typing)          | G1SKF                                                        | CTG CCC GAA TTY GTA AAT GA              | One-Step <sup>®</sup> RT-PCR<br>(Qiagen)                      | Kojima <i>et al</i> , 2002 [18]               |
|               |                             | G1SKR                                                        | CCA ACC CAR CCA TTR TAC A               |                                                               |                                               |
| Norovirus GII | RT-qPCR<br>(screening)      | QNIF2d                                                       | ATG TTC AGR TGG ATG AGR TTC TCW GA      | TaqMan <sup>®</sup> fast Virus 1-Step<br>(Applied Biosystems) | Da Silva <i>et al</i> , 2007 [19]             |
|               |                             | COG2R                                                        | TCG ACG CCA TCT TCA TTC ACA AGA TCG     |                                                               |                                               |
|               |                             | QNIFs *                                                      | AGC ACG TGG GAG GGG ATC                 |                                                               |                                               |
|               | RT-PCR<br>(typing)          | G2SKF                                                        | CNT GGG AGG GCG ATC GCA A               | One-Step <sup>®</sup> RT-PCR<br>(Qiagen)                      | Kojima <i>et al</i> , 2002 [18]               |
|               |                             | G2SKR                                                        | CCR CCN GCA TRH CCR TTR TAC AT          |                                                               |                                               |
| Rotavirus     | RT-qPCR<br>(screening)      | VP2-F1                                                       | TCT GCA GAC AGT TGA ACC TAT TAA         | TaqMan <sup>®</sup> fast Virus 1-Step<br>(Applied Biosystems) | Gutierrez-Aguirre <i>et al</i> ,<br>2008 [20] |
|               |                             | VP2-F2                                                       | CAG ACA CGG TTG AAC CCA TTA A           |                                                               |                                               |
|               |                             | VP2-F3                                                       | TCG GCT GAT ACA GTA GAA CCT ATA AAT G   |                                                               |                                               |
|               |                             | VP2-F4                                                       | TGT CAG CTG ATA CAG TAG AAC CTA TAA ATG |                                                               |                                               |
|               |                             | VP2-F5                                                       | TCA GCT GAC ACA GTA GAA CCT ATA AAT G   |                                                               |                                               |
|               |                             | VP2-R1                                                       | GTT GGC GTT TAC AGT TCG TTC AT          |                                                               |                                               |
|               |                             | VP2-R2                                                       | GTT GGC GTC TAC AAT TCG TTC AT          |                                                               |                                               |
|               |                             | VP2-P *                                                      | ATG CGC ATR TTR TCA AAH GCA A           |                                                               |                                               |
|               | RT-PCR<br>(typing)          | VP7-F                                                        | ATG TAT GGT ATT GAA TAT ACC AC          | One-Step <sup>®</sup> RT-PCR<br>(Qiagen)                      | Iturriza-Gómara <i>et al</i> ,<br>2001 [21]   |
|               |                             | VP7-R                                                        | AAC TTG CCA CCA TTT TTT CC              |                                                               |                                               |
|               |                             | G1                                                           | CAA GTA CTC AAA TCA ATG ATG G           |                                                               |                                               |
|               |                             | G2                                                           | CAA TGA TAT TAA CAC ATT TTC TGT G       |                                                               |                                               |
|               |                             | G3                                                           | ACG AAC TCA ACA CGA GAG G               |                                                               |                                               |
| G4            |                             | CGT TTC TGG TGA GGA GTT G                                    |                                         |                                                               |                                               |
| G8            | TTR TCG CAC CAT TTG TGA AAT | AmpliTaq <sup>®</sup> DNA Polymerase<br>(Applied Biosystems) | EuroRotaNet, 2009 [22]                  |                                                               |                                               |
| G9            | CTT GAT GTG ACT AYA AAT AC  |                                                              |                                         |                                                               |                                               |
| G10           | ATG TCA GAC TAC ARA TAC TGG |                                                              |                                         |                                                               |                                               |
| G12           | GGT TAT GTA ATC CGA TGG ACG |                                                              |                                         |                                                               |                                               |
| VP7-RINT      | ANA YNG ANC CWG TYG GCC A   |                                                              |                                         |                                                               |                                               |
|               | VP4-F                       |                                                              |                                         | TAT GCT CCA GTN AAT TGG                                       | One-Step <sup>®</sup> RT-PCR<br>(Qiagen)      |
|               | VP4-R                       | ATT GCA TTT CTT TCC ATA ATG                                  |                                         |                                                               |                                               |
|               | 2T-1                        | CTA TTG TTA GAG GTT AGA GTC                                  | AmpliTaq <sup>®</sup> DNA Polymerase    | EuroRotaNet, 2009 [22]                                        |                                               |

|             |                                     |                                            |                                                                                                            |                                                               |                                                                         |
|-------------|-------------------------------------|--------------------------------------------|------------------------------------------------------------------------------------------------------------|---------------------------------------------------------------|-------------------------------------------------------------------------|
|             |                                     | 3T-1                                       | TGT TGA TTA GTT GGA TTC AA                                                                                 | (Applied Biosystems)                                          |                                                                         |
|             |                                     | 1T-1D                                      | TCT ACT GGR TTR ACN TGC                                                                                    |                                                               |                                                                         |
|             |                                     | 4T-1                                       | TGA GAC ATG CAA TTG GAC                                                                                    |                                                               |                                                                         |
|             |                                     | 5T-1                                       | ATC ATA GTT AGT AGT CGG                                                                                    |                                                               |                                                                         |
|             |                                     | P[11]                                      | GTA AAC ATC CAG AAT GTG                                                                                    |                                                               |                                                                         |
| Astrovirus  | RT-qPCR<br>(screening)              | AV1<br>AV2<br>AVs *                        | CCG AGT AGG ATC GAG GGT<br>GCT TCT GAT TAA ATC AAT TTT AA<br>CTT TTC TGT CTC TGT TTA GAT TAT TTT AAT CAC C | TaqMan <sup>®</sup> fast Virus 1-Step<br>(Applied Biosystems) | Le Cann <i>et al</i> , 2004 [24]                                        |
|             | RT-PCR<br>(typing)                  | MON244<br>MON245                           | GGT GTC ACA GGA CCA AAA CC<br>TTA GTG AGC CAC CAG CCATC                                                    | One-Step <sup>®</sup> RT-PCR<br>(Qiagen)                      | Noel <i>et al</i> , 1995 [25]                                           |
| Sapovirus   | RT-qPCR<br>(screening)              | SaV124F<br>SaV1F<br>SaV1245R<br>SaV124TP * | GAY CAS GCT CTC GCY ACC TAC<br>TTG GCC CTC GCC ACC TAC<br>CCC TCC ATY TCA AAC ACT A<br>CCR CCT ATR AAC CA  | TaqMan <sup>®</sup> fast Virus 1-Step<br>(Applied Biosystems) | Oka <i>et al</i> , 2006 [26]                                            |
|             | RT-PCR<br>(typing)                  | SR80<br>NV110                              | TGG GAT TCT ACA CAA AAC CC<br>ACD ATY TCA TCA TCA CCA TA                                                   | One-Step <sup>®</sup> RT-PCR<br>(Qiagen)                      | Noel <i>et al</i> , 1997 [27]<br>Le Guyader <i>et al</i> , 1996<br>[28] |
| Adenovirus  | qPCR<br>(screening)                 | -                                          | -                                                                                                          | Adenovirus R-Gene <sup>®</sup><br>(Argene)                    | -                                                                       |
|             | PCR<br>(typing)                     | Hex1DEG<br>Hex2DEG                         | GCC SCA RTG GKC WTA CAT GCA CAT C<br>CAG CAC SCC ICG RAT GTC AAA                                           | AmpliTaq <sup>®</sup> DNA Polymerase<br>(Applied Biosystems)  | Allard <i>et al</i> , 2001 [29]                                         |
| Aichi virus | RT-PCR<br>(screening<br>and typing) | 6261<br>6779                               | ACA CTC CCA CCT CCC GCC AGT A<br>GGA AGA GCT GGG TGT CAA GA                                                | One-Step <sup>®</sup> RT-PCR<br>(Qiagen)                      | Yamashita <i>et al</i> , 2000<br>[30]                                   |

\* Probes
